# Supplementary material for: Interactive metal ion–silicon oxidation/reduction processes on fumed silica
Source: Royal Society of Chemistry journal article supplement (doi:10.1039/c2ra20580g), 2012-01-01
Supplement: c2ra20580g.pdf [file c2ra20580g.pdf]

Cite this: DOI: 10.1039/c0xx00000x

www.rsc.org/xxxxxx

**ARTICLE TYPE**

## Electronic Supplementary Information

### Interactive Metal Ion-Silicon Oxidation/Reduction Processes on Fumed Silica

5 *J. Wang,<sup>a</sup> B. Mao,<sup>a</sup> M. G. White,<sup>b\*</sup> C. Burda,<sup>a</sup> and J. L. Gole<sup>c</sup>*

*Received (in XXX, XXX) Xth XXXXXXXXX 20XX, Accepted Xth XXXXXXXXX 20XX*

DOI: 10.1039/b000000x

Figure S1: Core-level XPS spectra for Fe-Cab samples, Survey Scan

10

Figure S2: Water Contact Angle Data for CAB-O-SIL Sample

Figure S3: Core-level XPS spectra for Cu-Cab samples, Survey Scan

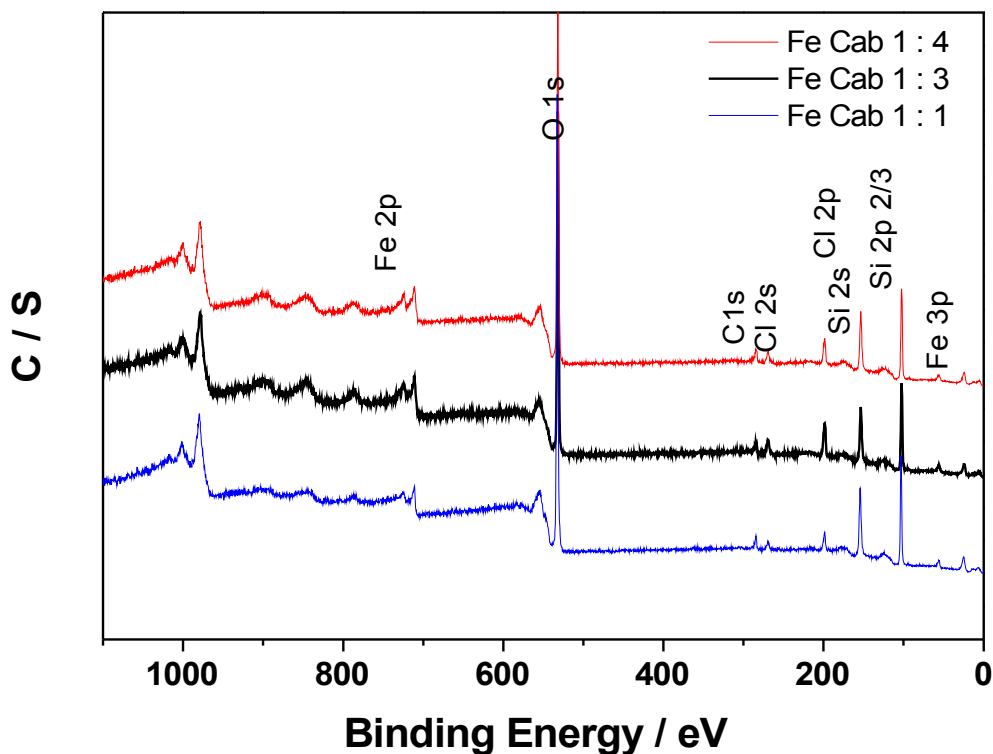

5 **Figure S1:** Core-level XPS spectra for Fe-Cab samples as indicated in the figure. Top spectrum is Fe Cab 1:4 sample; middle spectrum is for Fe Cab 1:3 sample, and bottom spectrum is for Fe Cab 1:1 sample.

Cite this: DOI: 10.1039/c0xx00000x

www.rsc.org/xxxxxx

ARTICLE TYPE

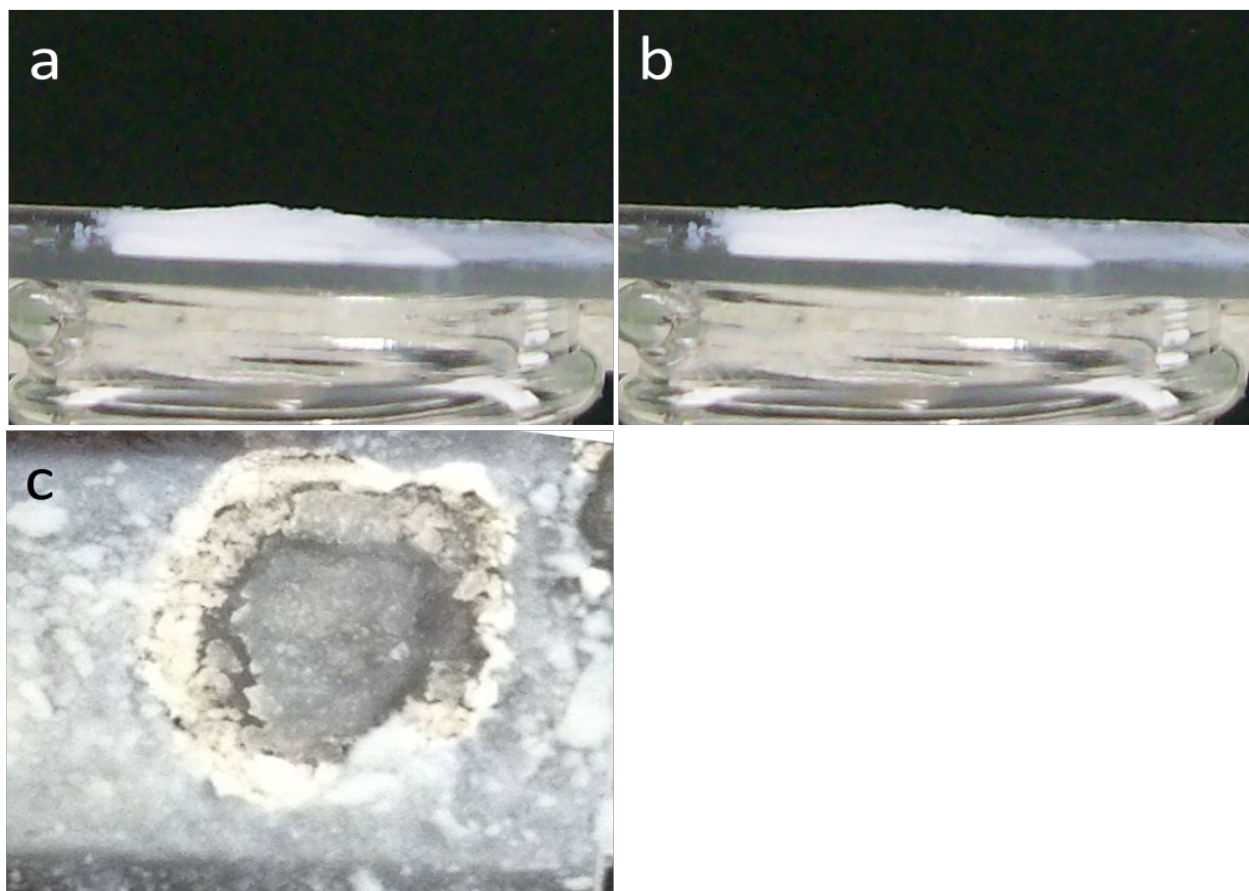

5 **Figure S2:** (a) side view before water droplet is introduced to the CAB-O-SIL surface (b) side view after a water droplet has been introduced (c) front view after a water droplet was introduced.

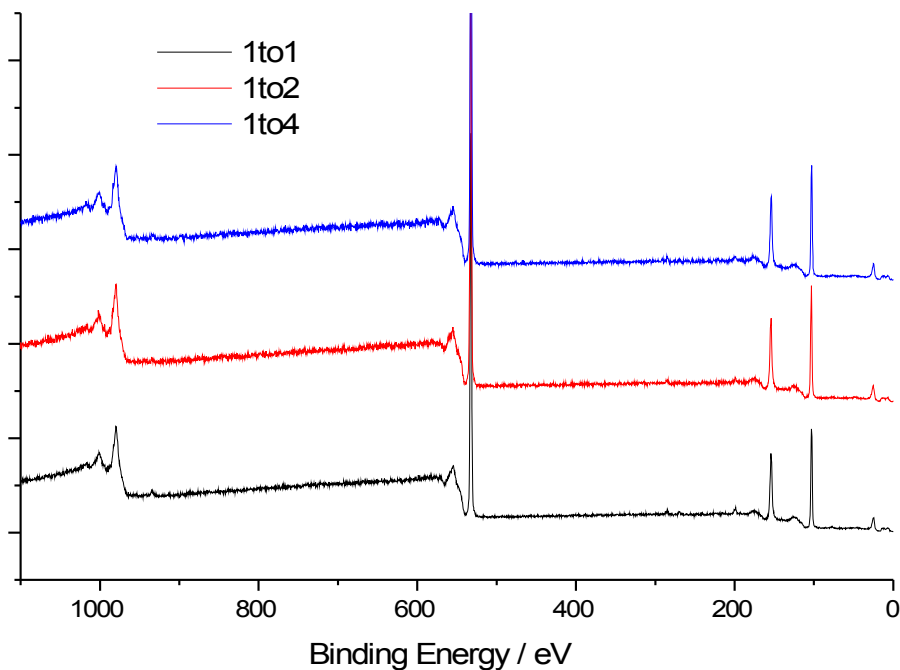

- 5 **Figure S3:** Core-level XPS spectra for Cu-Cab samples as indicated in the figure. Top spectrum is Cu Cab 1:4 sample; middle spectrum is for Cu Cab 1:2 sample, and bottom spectrum is for Cu Cab 1:1 sample.
